# Supplementary material for: T cell exhaustion assessment algorism in tumor microenvironment predicted clinical outcomes and immunotherapy effects in glioma
Source: Front Genet. 2022 Dec 2;13:1087434. doi: 10.3389/fgene.2022.1087434 (PMC9755497; doi:10.3389/fgene.2022.1087434)
Supplement: Supplementary file 1 [file Table2.XLSX]

## Sheet: Sheet1
HSPB1	forward	5′-GCG TGT CCC TGG ATG TCA AC-3′
	reverse	5′-TGT ATT TCC GCG TGA AGC AC-3′
GAPDH	forward	5’-GGA GCG AGA TCC CTC CAA AAT-3’
	reverse	5’-GGC TGT TGT CAT ACT TCT CAT GG-3’
